# Supplementary material for: Lack of Salivary Long Non-Coding RNA XIST Expression Is Associated with Increased Risk of Oral Squamous Cell Carcinoma: A Cross-Sectional Study
Source: MDPI journal article supplement (doi:10.3390/jcm10194622), 2021-10-08
Supplement: s1 [file s1]

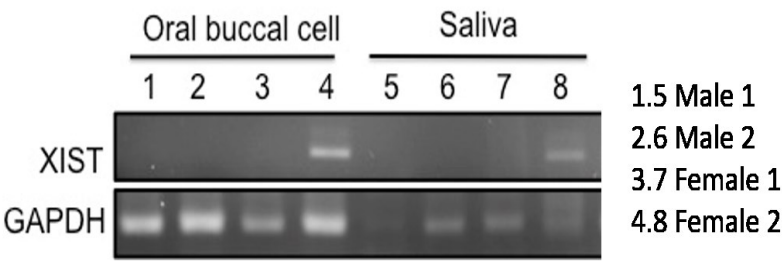

Supplementary Figure S1. The XIST and GAPDH expression of two normal males and two normal females

(A)

| OSCC male n=33 |       | Normal male n=16 |       |
|----------------|-------|------------------|-------|
| XIST           | GAPDH | XIST             | GAPDH |
| UD             | 27.95 | UD               | 30.86 |
| UD             | 31.04 | UD               | 31.91 |
| UD             | 26.53 | UD               | 30.34 |
| UD             | 29.13 | UD               | 31.34 |
| UD             | 29.58 | UD               | 31.63 |
| UD             | 29.49 | UD               | 32.49 |
| UD             | 30.52 | UD               | 31.99 |
| UD             | 31.28 | UD               | 29.95 |
| UD             | 28.62 | UD               | 32.82 |
| UD             | 30.88 | UD               | 28.32 |
| UD             | 27    | UD               | 30.24 |
| UD             | 35.82 | UD               | 27.28 |
| UD             | 31.38 | UD               | 28.96 |
| UD             | 29.36 | UD               | 34.34 |
| UD             | 27.69 | UD               | 36.85 |
| UD             | 28.33 | UD               | 30.75 |
| UD             | 28.46 |                  |       |
| UD             | 32.2  |                  |       |
| UD             | 33.2  |                  |       |
| UD             | 29.94 |                  |       |
| UD             | 33.61 |                  |       |
| UD             | 28.25 |                  |       |
| UD             | 32.54 |                  |       |
| UD             | 31.96 |                  |       |
| UD             | 29.08 |                  |       |
| UD             | 30.13 |                  |       |
| UD             | 30.42 |                  |       |
| UD             | 25.87 |                  |       |
| UD             | 30.92 |                  |       |
| UD             | 31.23 |                  |       |
| UD             | 29.87 |                  |       |
| UD             | 32.66 |                  |       |
| UD             | 30.98 |                  |       |

(B)

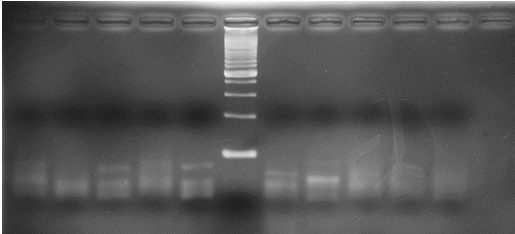

Supplementary Figure S2. The qPCR results of salivary XIST and GAPDH.

- (A) The qPCR Ct value of male XIST and GAPDH. UD: undetermined.
- (B) Sampling part of the male qPCR sample to Check the XIST expression in agarose gel
